# Supplementary material for: A history-matching analysis of the Antarctic Ice Sheet since the last interglacial – Part 1: Ice sheet evolution
Source: Copernicus journal article supplement (doi:10.5194/egusphere-2024-1291), 2024-05-15
Supplement: Supplementary file 1 [file egusphere-2024-1291-supplement.pdf]

# A history-matching analysis of the Antarctic Ice Sheet since the last interglacial – Part 1: Ice sheet evolution

## Supplement Figures

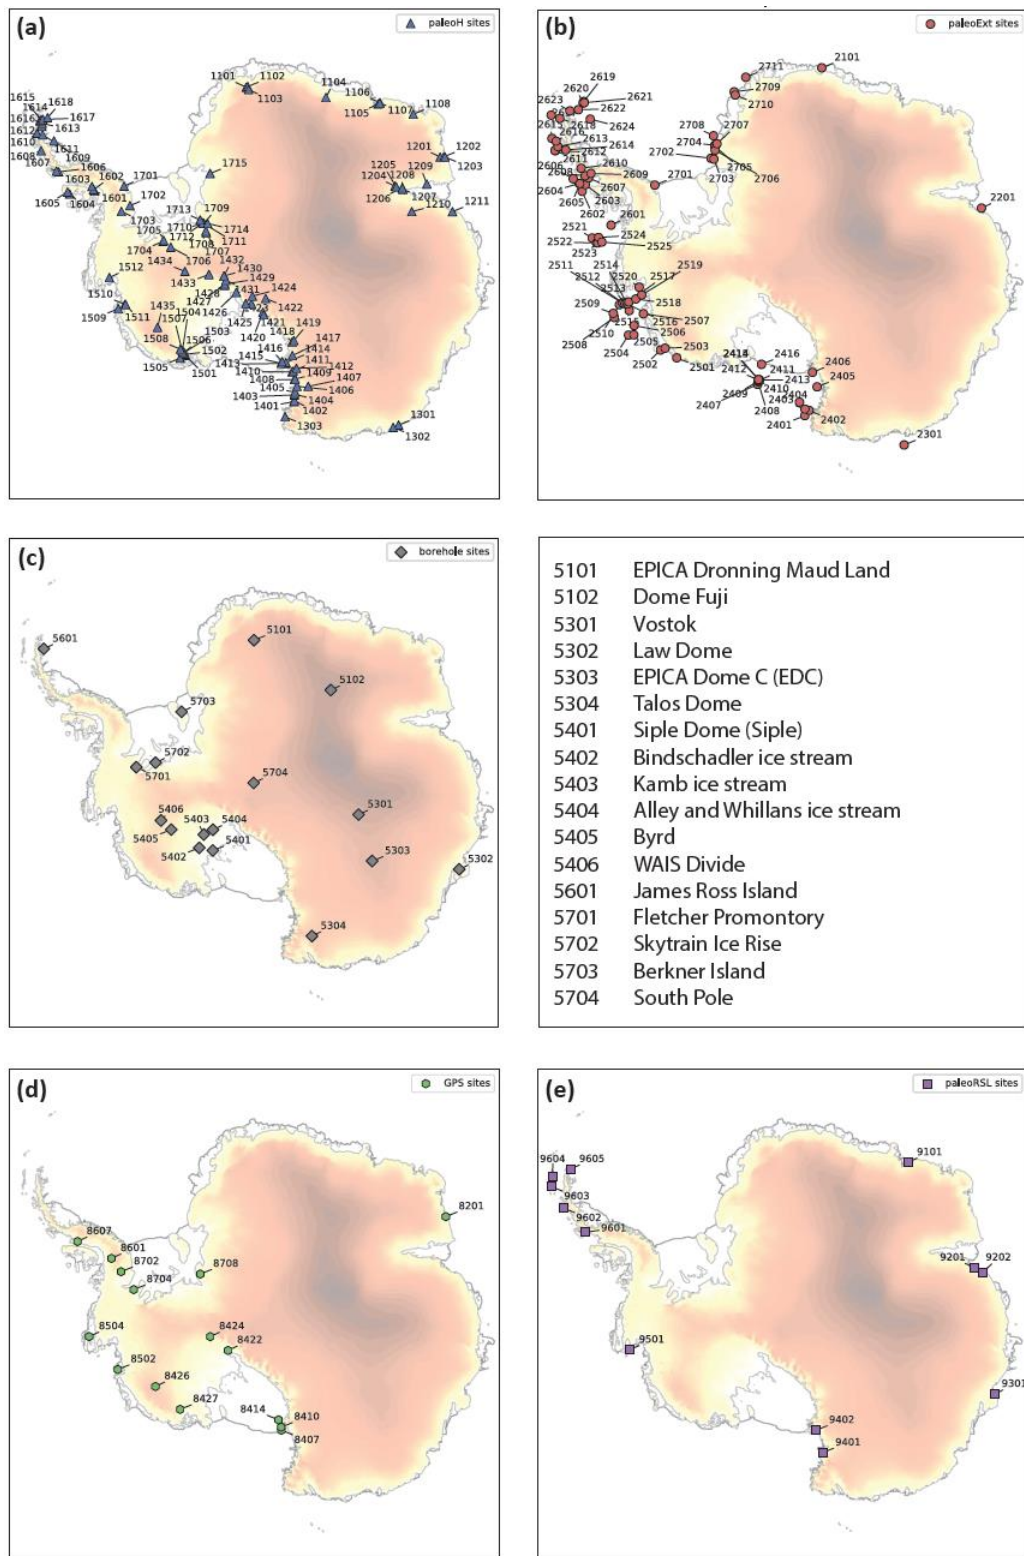

**Figure S1:** AntICE2 observational constraint database used to history match the Glacial Systems Model. a - f) are the site locations and identification numbers for past ice thickness data (paleoH), past ice extent data (paleoExt), ice core borehole temperature profiles (ICbore) and names, present-day uplift rates (rdotGPS), and past relative sea level data (paleoRSL) respectively.

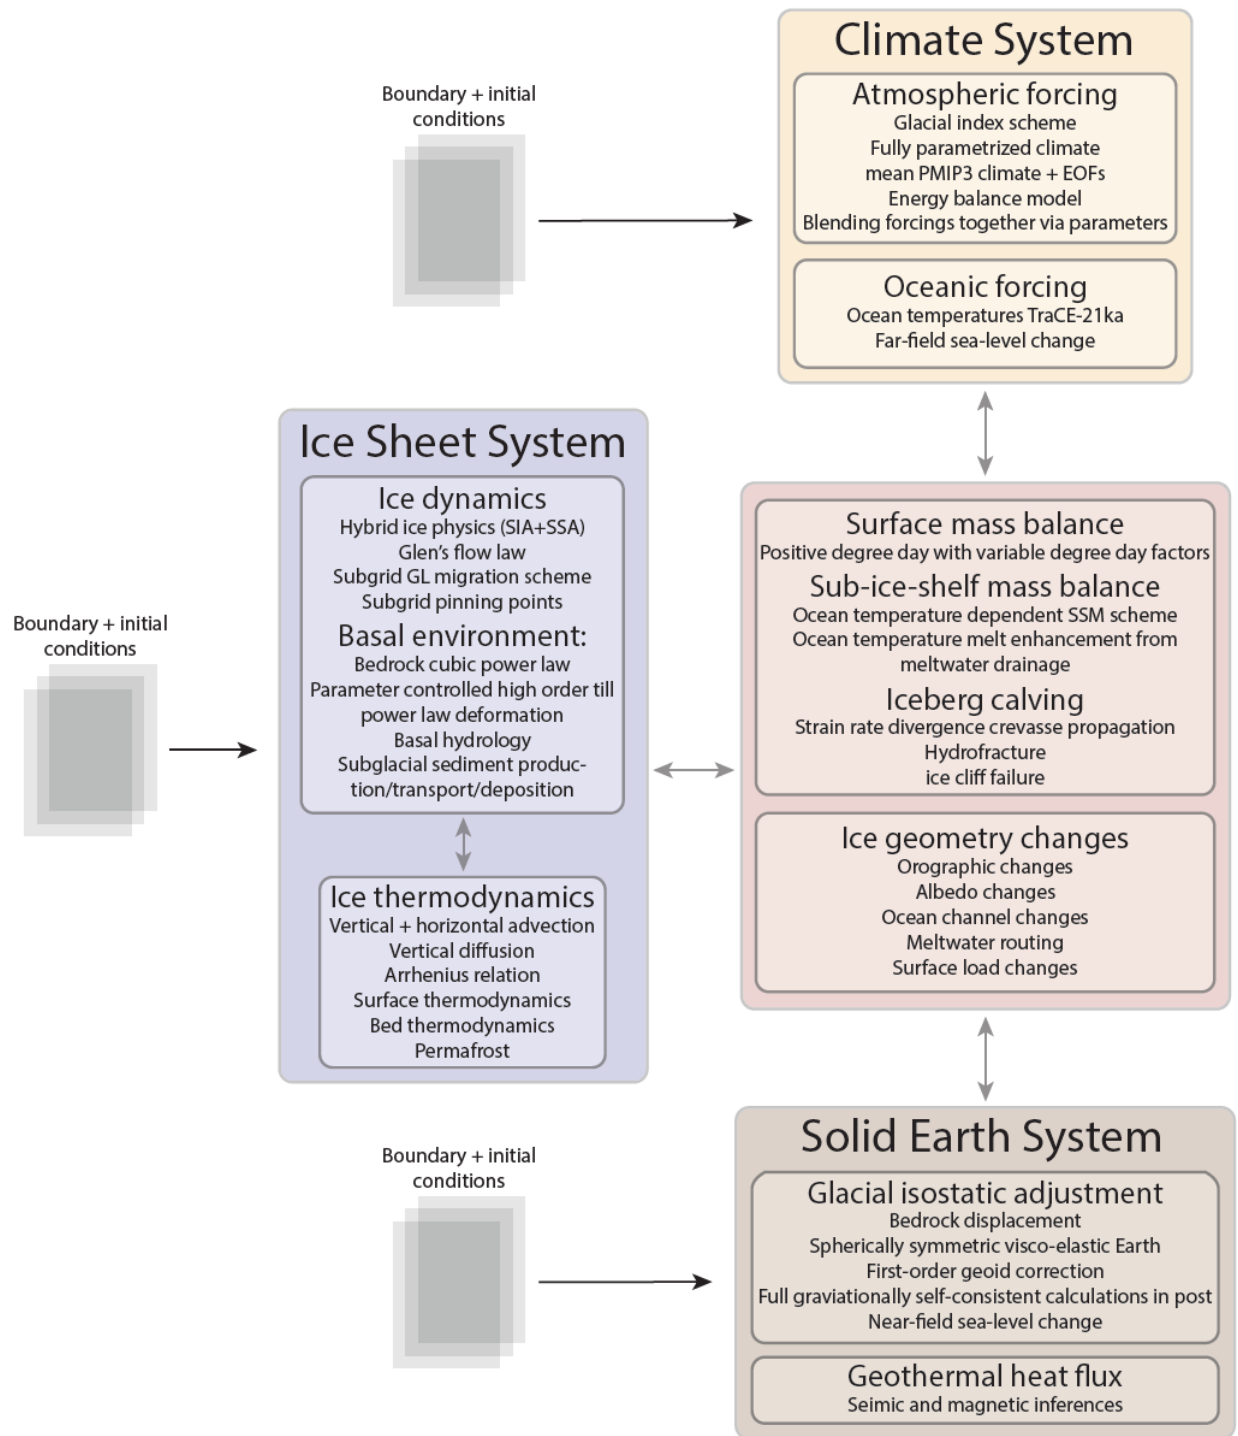

**Figure S2:** Diagram summarizing major components of the Glacial Systems Model (GSM).

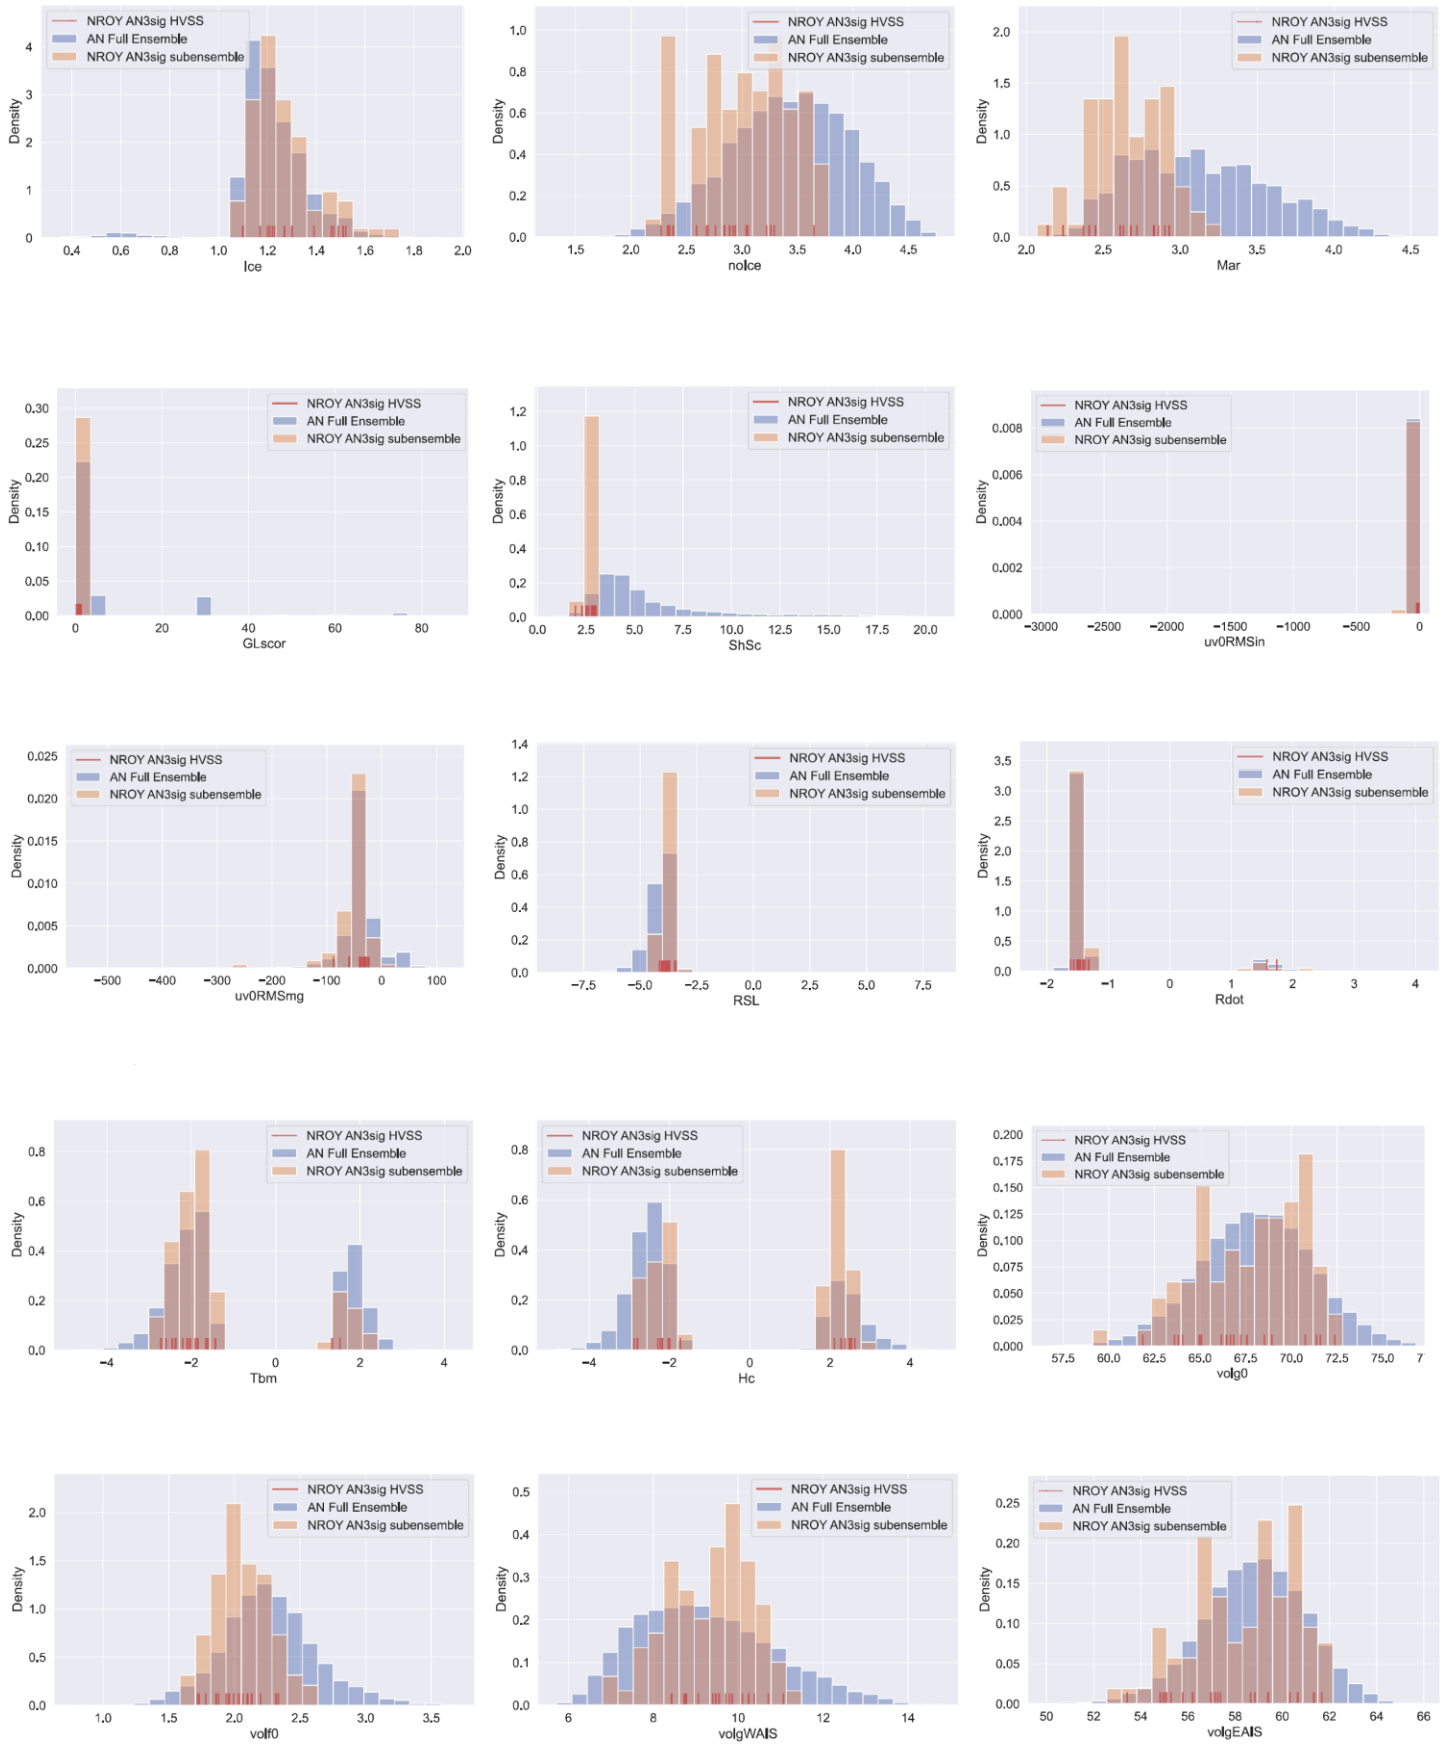

**Figure S3:** Distribution of output metrics and scores for the full ensemble (blue), not-ruled-out-yet (NROY) AN3sig sub-ensemble (orange), and NROY sub-ensemble high variance subset (red).

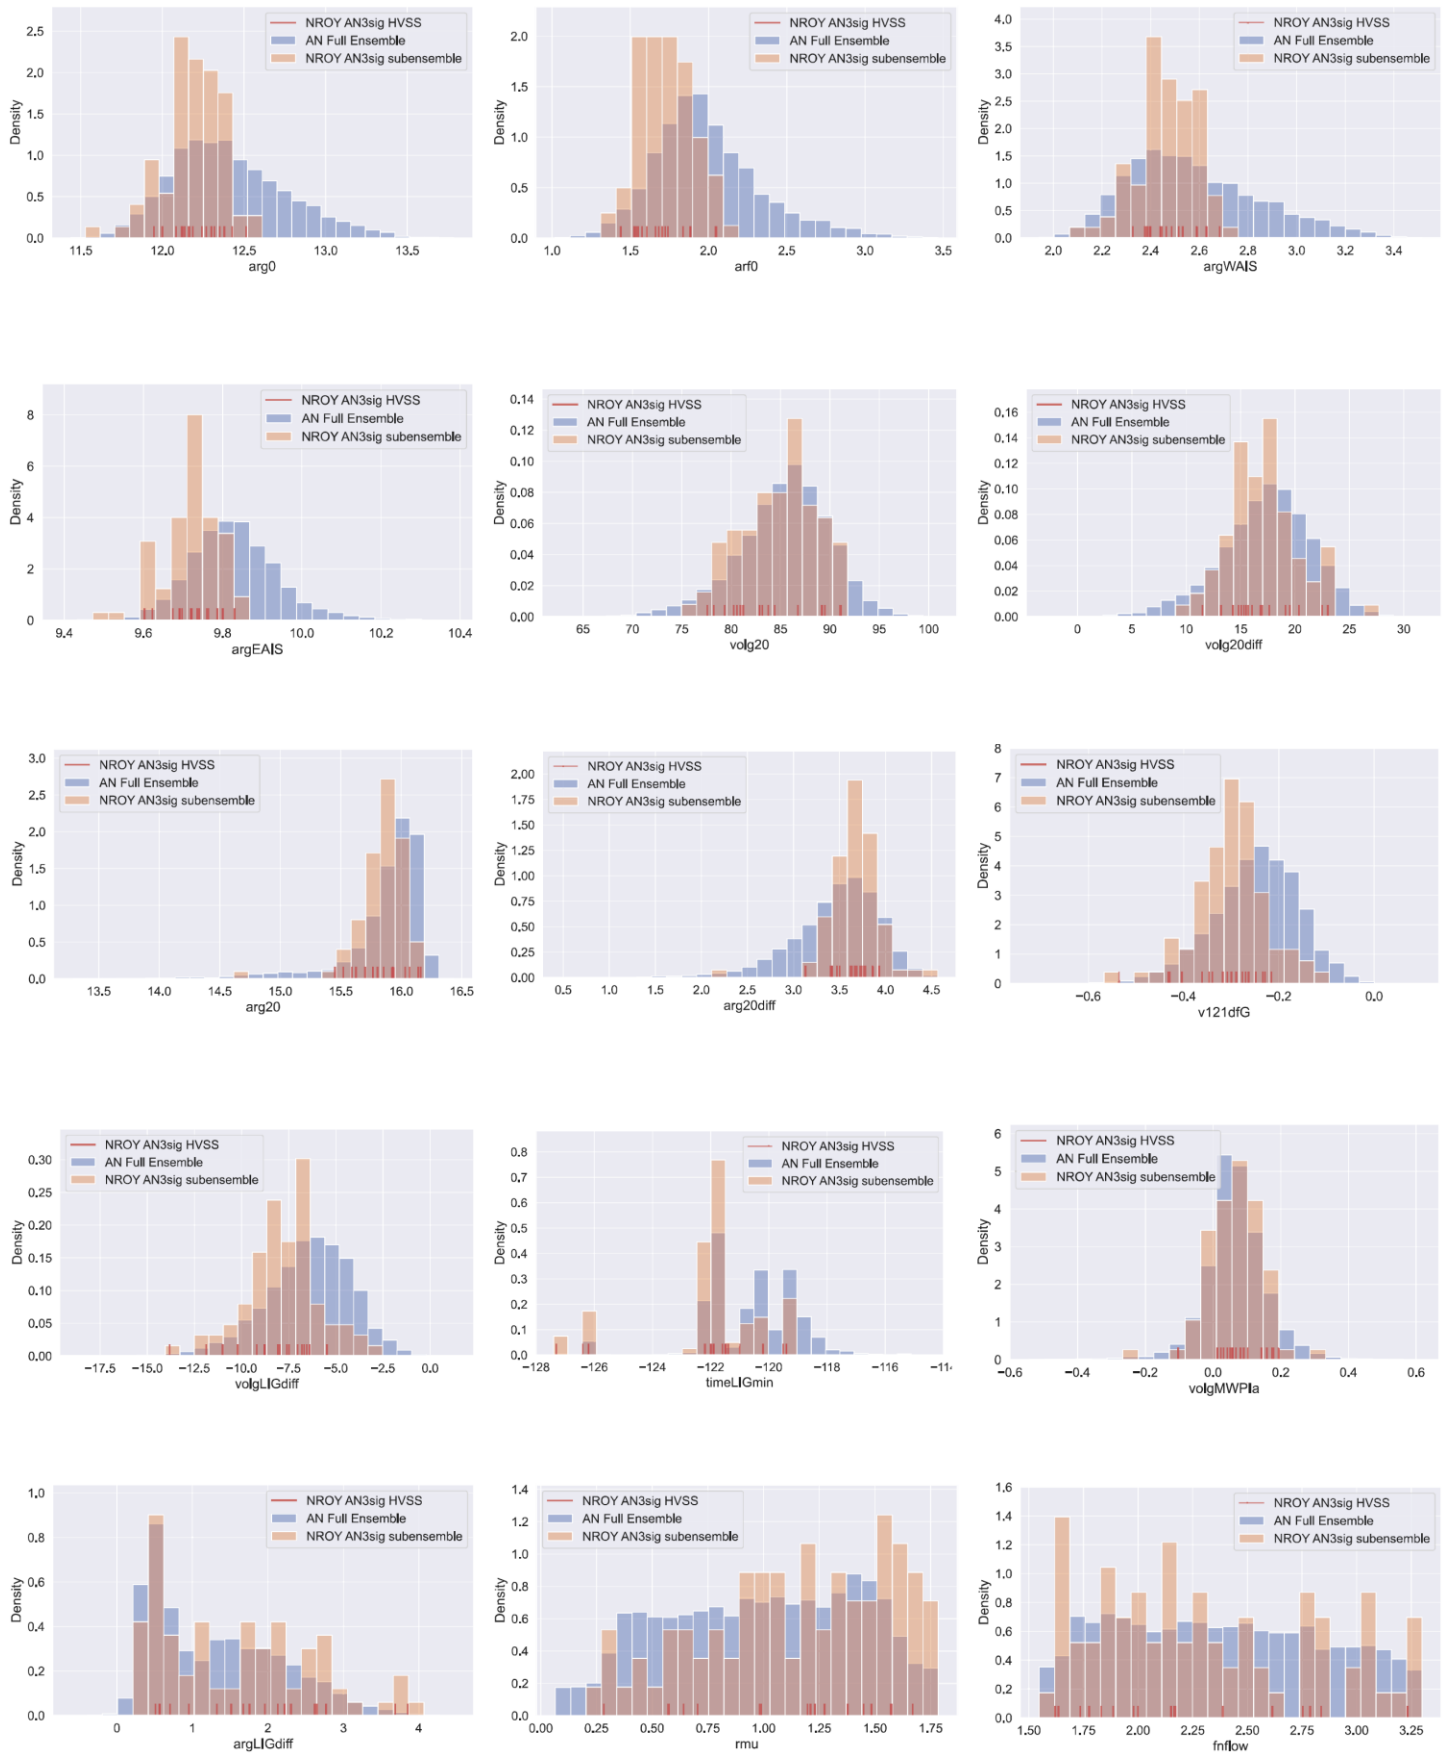

**Figure S4:** Distribution of output metrics, scores, and ensemble parameters (detailed in Table 1) for the full ensemble (blue), not-ruled-out-yet (NROY) AN3sig sub-ensemble (orange), and NROY sub-ensemble high variance subset (red).

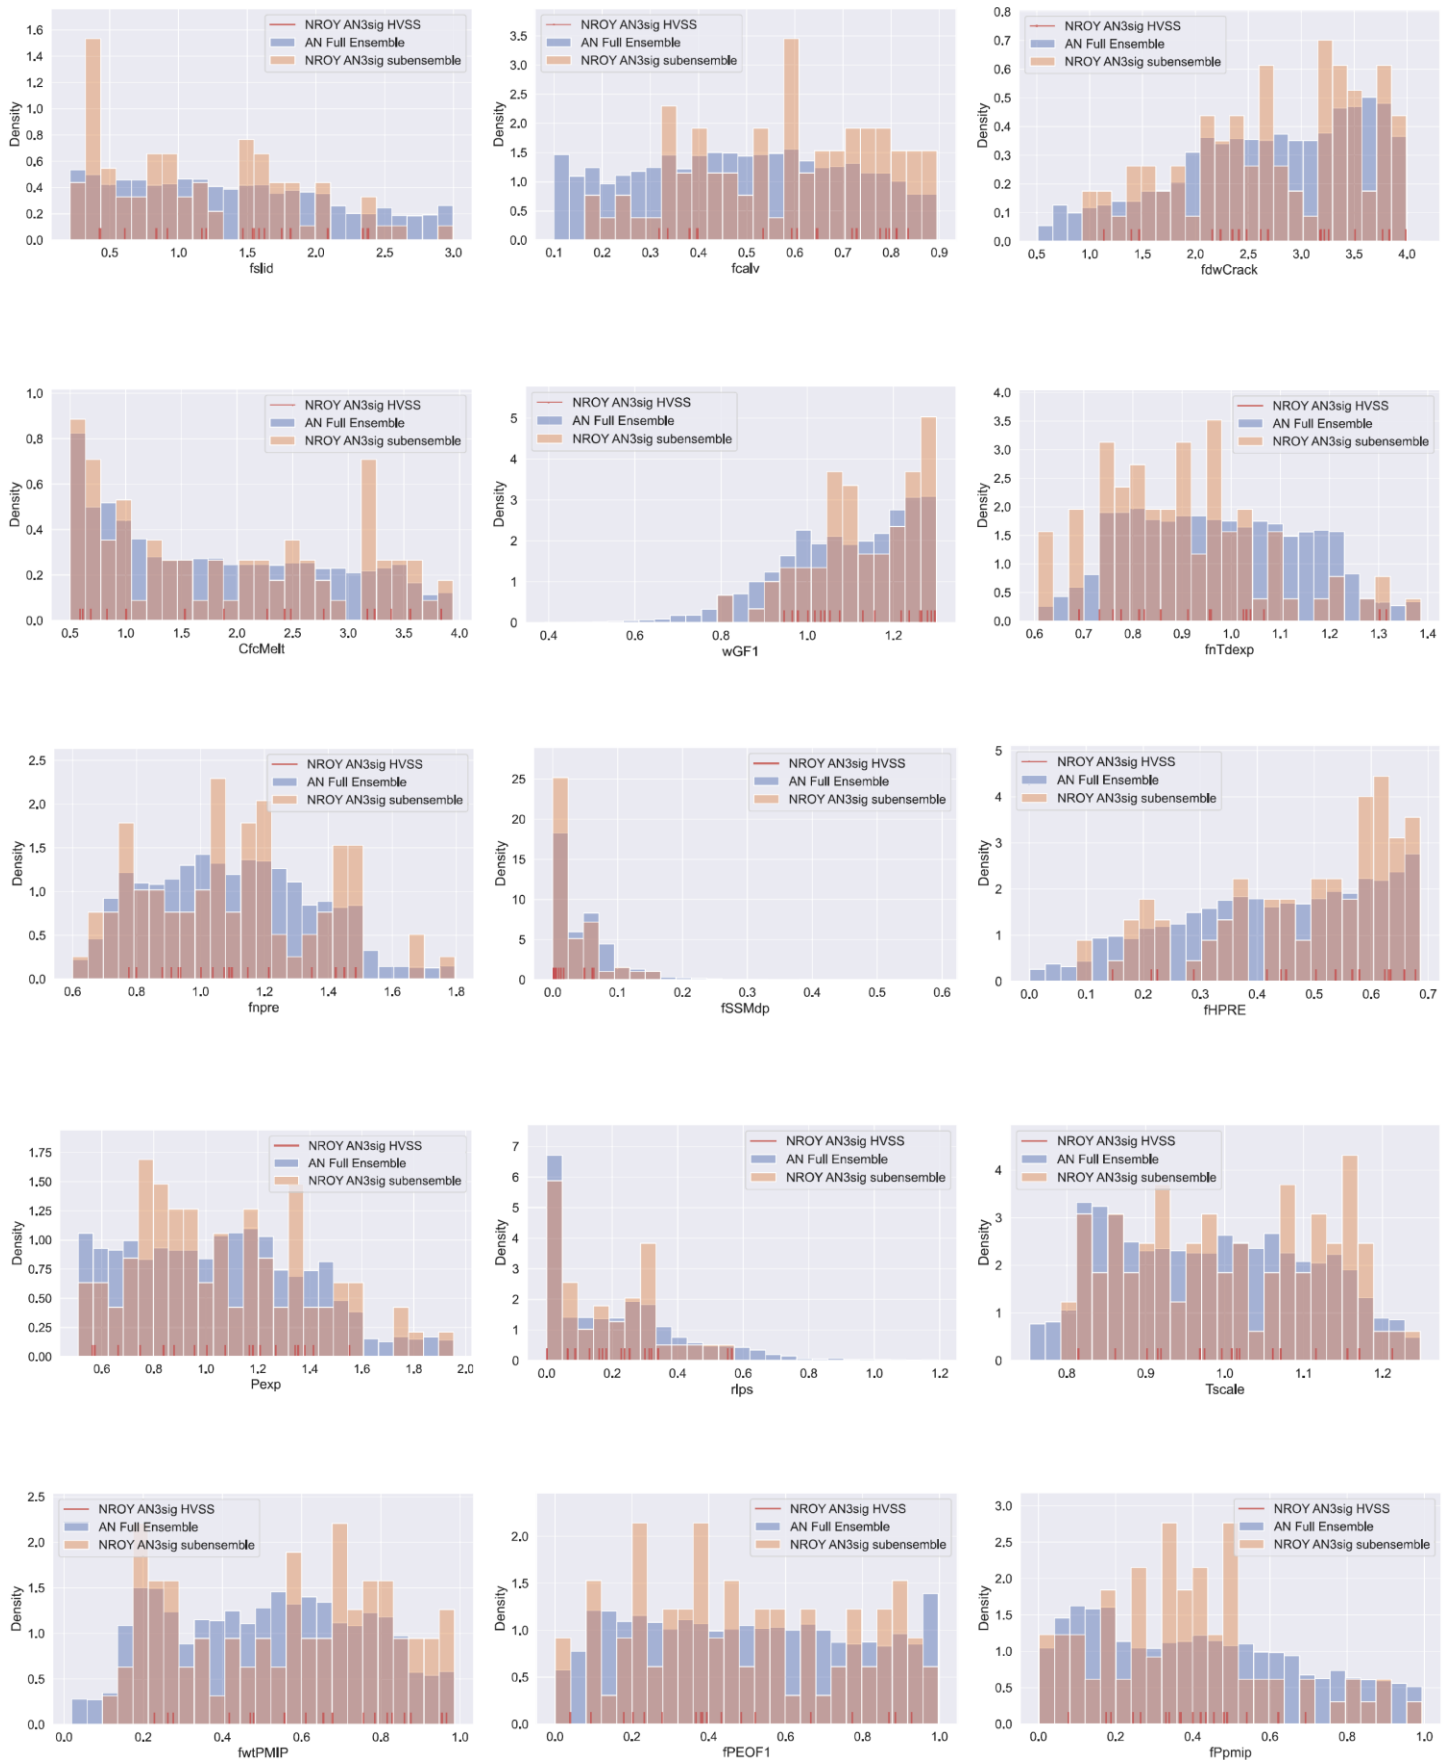

**Figure S5:** Distribution of ensemble parameters (detailed in Table 1) for the full ensemble (blue), not-ruled-out-yet (NROY) AN3sig subensemble (orange), and NROY sub-ensemble high variance subset (red).

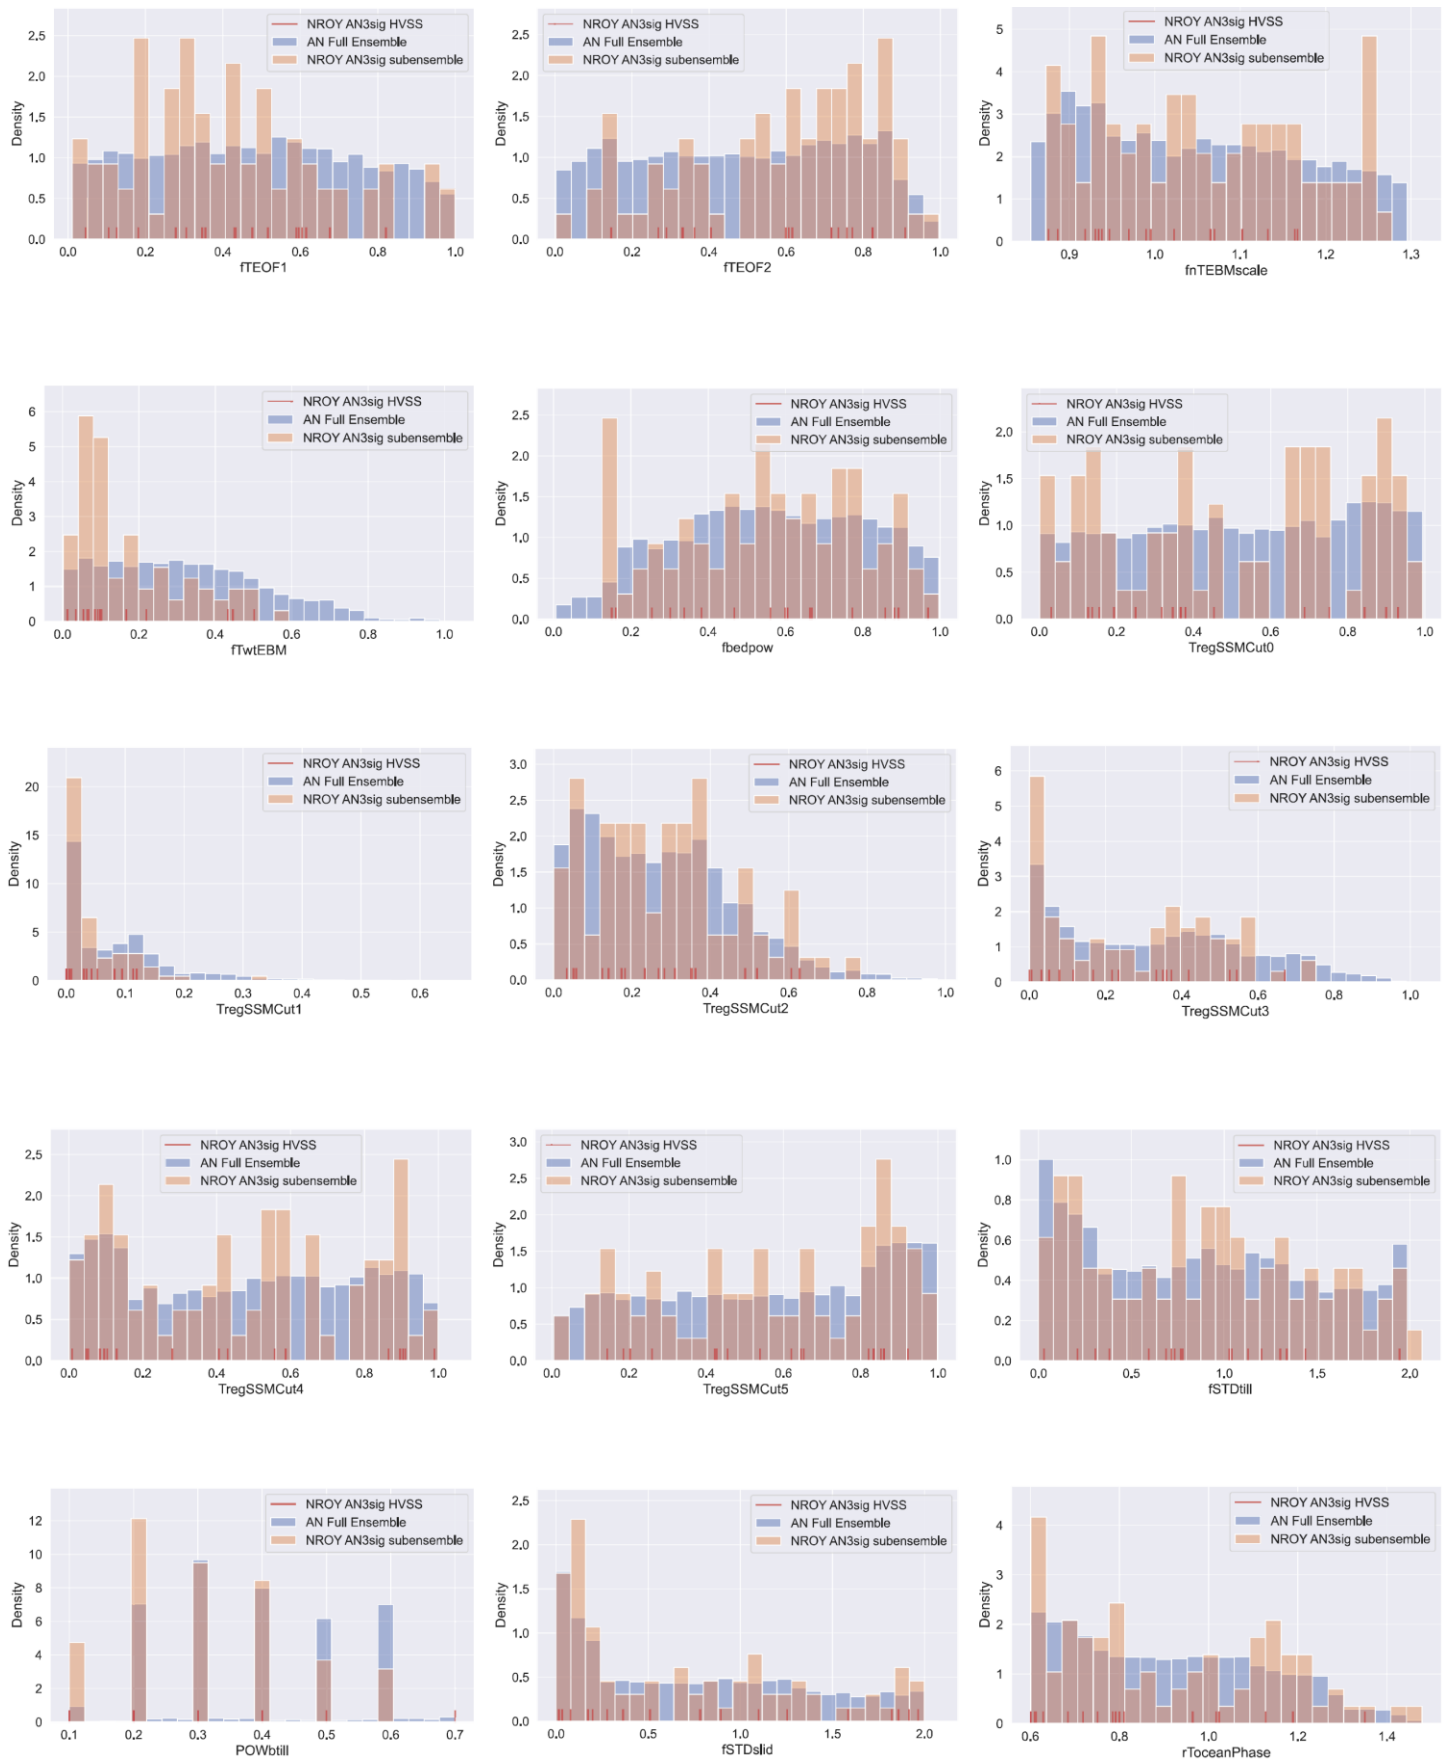

**Figure S6:** Distribution of ensemble parameters (detailed in Table 1) for the full ensemble (blue), not-ruled-out-yet (NROY) AN3sig subensemble (orange), and NROY sub-ensemble high variance subset (red).

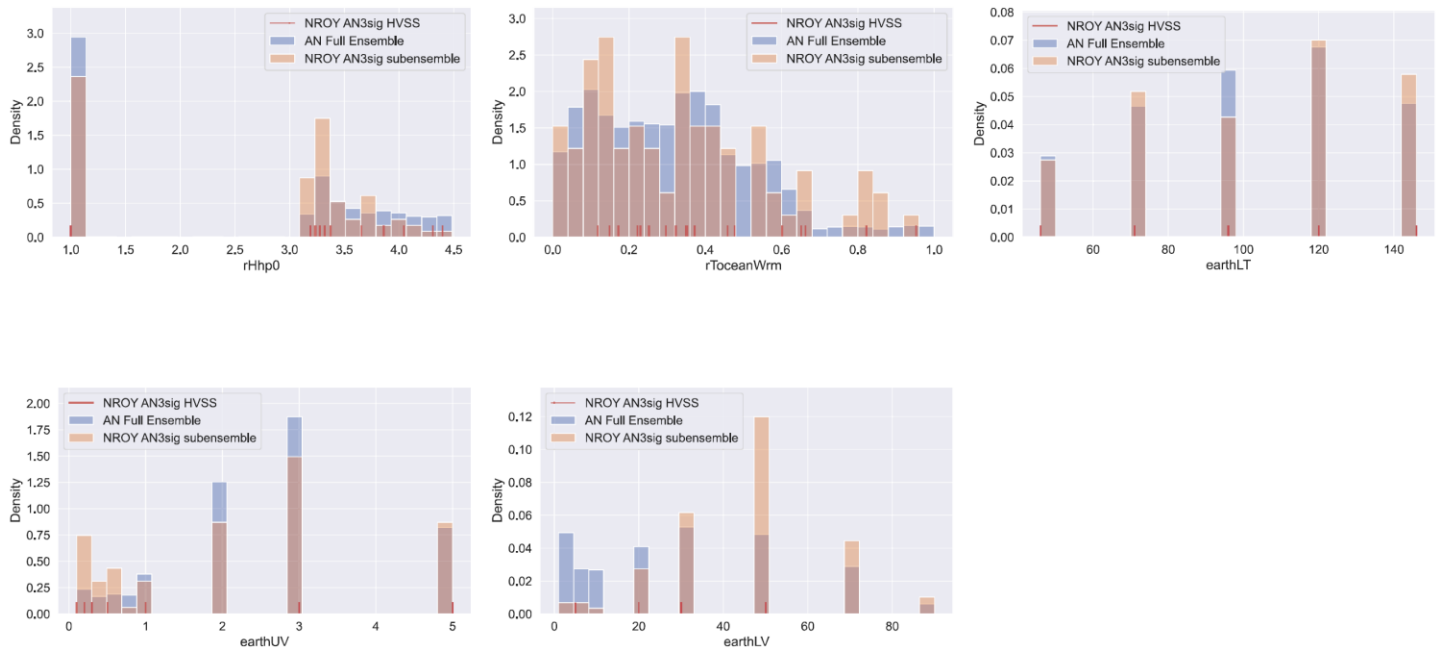

**Figure S7:** Distribution of ensemble parameters (detailed in Table 1) for the full ensemble (blue), not-ruled-out-yet (NROY) AN3sig sub-ensemble (orange), and NROY sub-ensemble high variance subset (red).

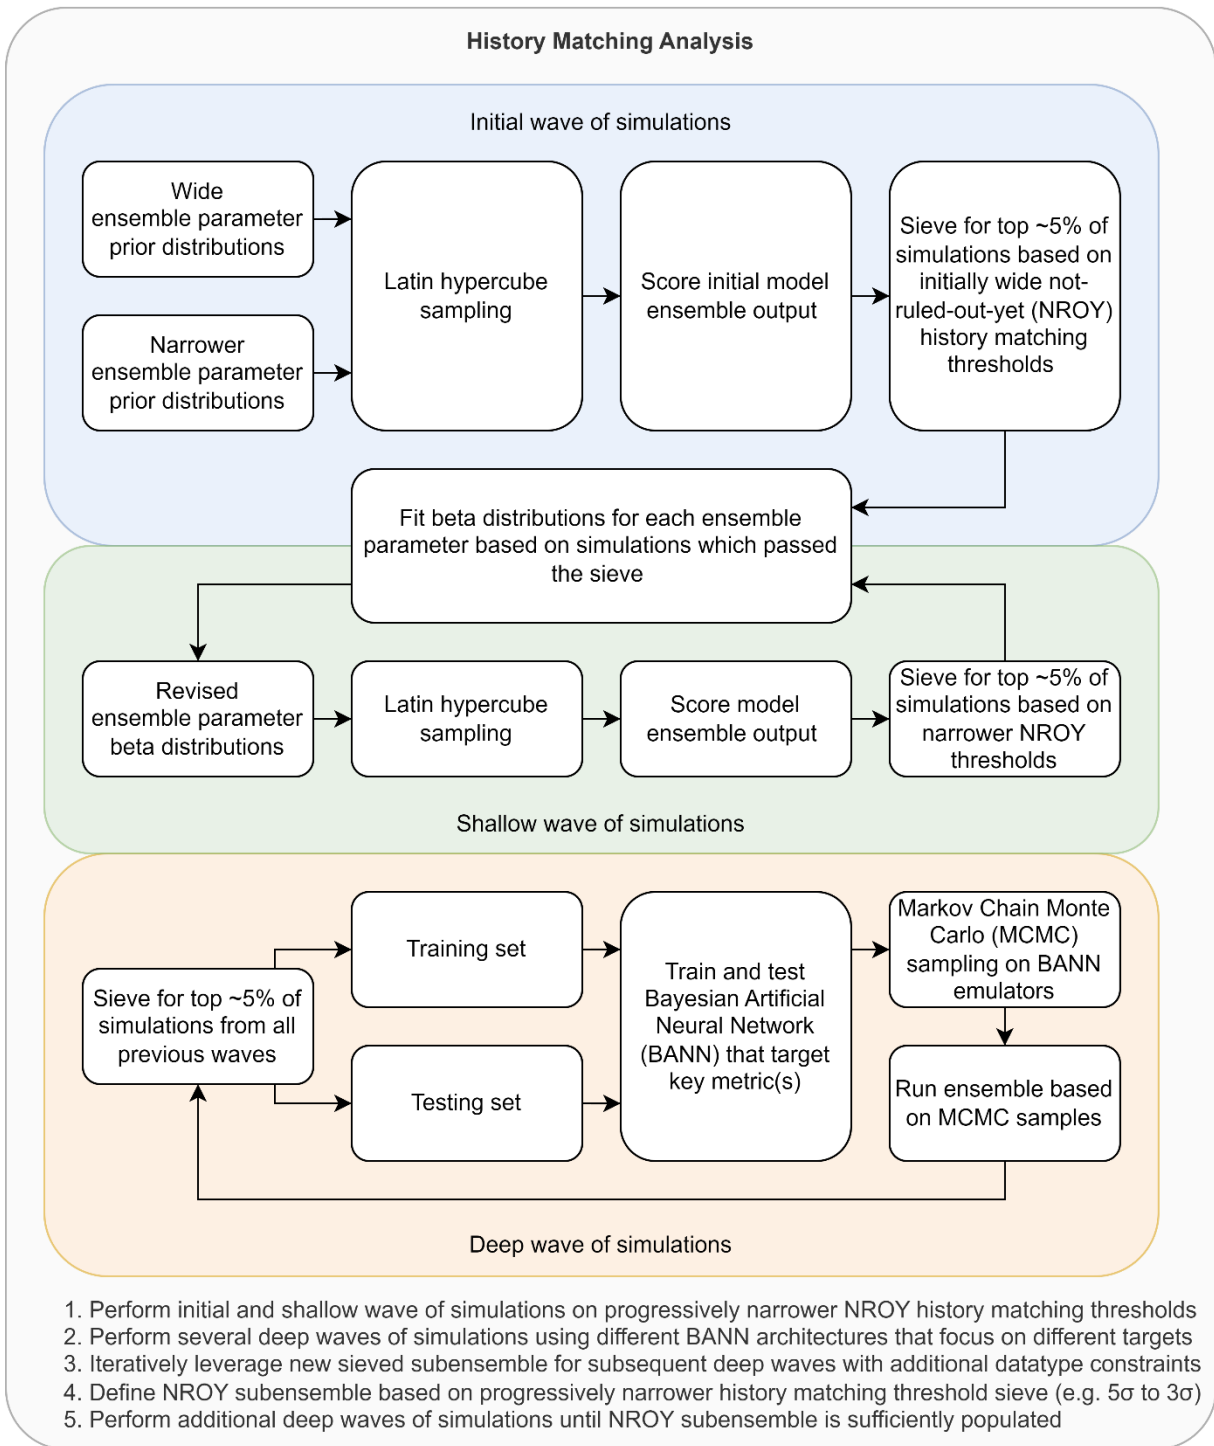

**Figure S8:** Diagram illustrating the history matching analysis methodology.



**Table S1:** The thresholds imposed on the AntICE2 data-model scores in the history matching analysis. The thresholds to define the AN4sig and AN3sig sub-ensembles are based on internal/external discrepancy bias corrections plus 4 or 3 multiples of the standard deviations, respectively.

| Constraint datatype | Score                            | Bias       | Standard deviation |
|---------------------|----------------------------------|------------|--------------------|
| Present-day         | WAIS H RMS (waisRMS)             | 0          | 161                |
| Present-day         | EAIS H RMS (eaisRMS)             | 16         | 135                |
| Present-day         | Floating ice H RMS (fltRMS)      | 34         | 65                 |
| Present-day         | Ice shelf score (ShSc)           | 0          | 1                  |
| Present-day         | PD grounding line score (GLscor) | 0          | 1                  |
| Borehole temp       | Borehole ice temp score (Tbm)    | 0          | 1                  |
| Borehole temp       | Ice core site H diff score (Hc)  | 0          | 1                  |
| Paleo extent        | Marine extent score (Mar)        | 0.14       | 1.04               |
| Paleo ice thickness | Deglaciated no ice score (nolce) | 0.22       | 1.02               |
| Paleo ice thickness | Glaciation ice score (Ice)       | 0.15       | 1                  |
| Paleo RSL           | RSL score (RSL)                  | -0.1       | 1.01               |
| GPS                 | Uplift rate score (Rdot)         | -0.02/0.06 | 1.06               |

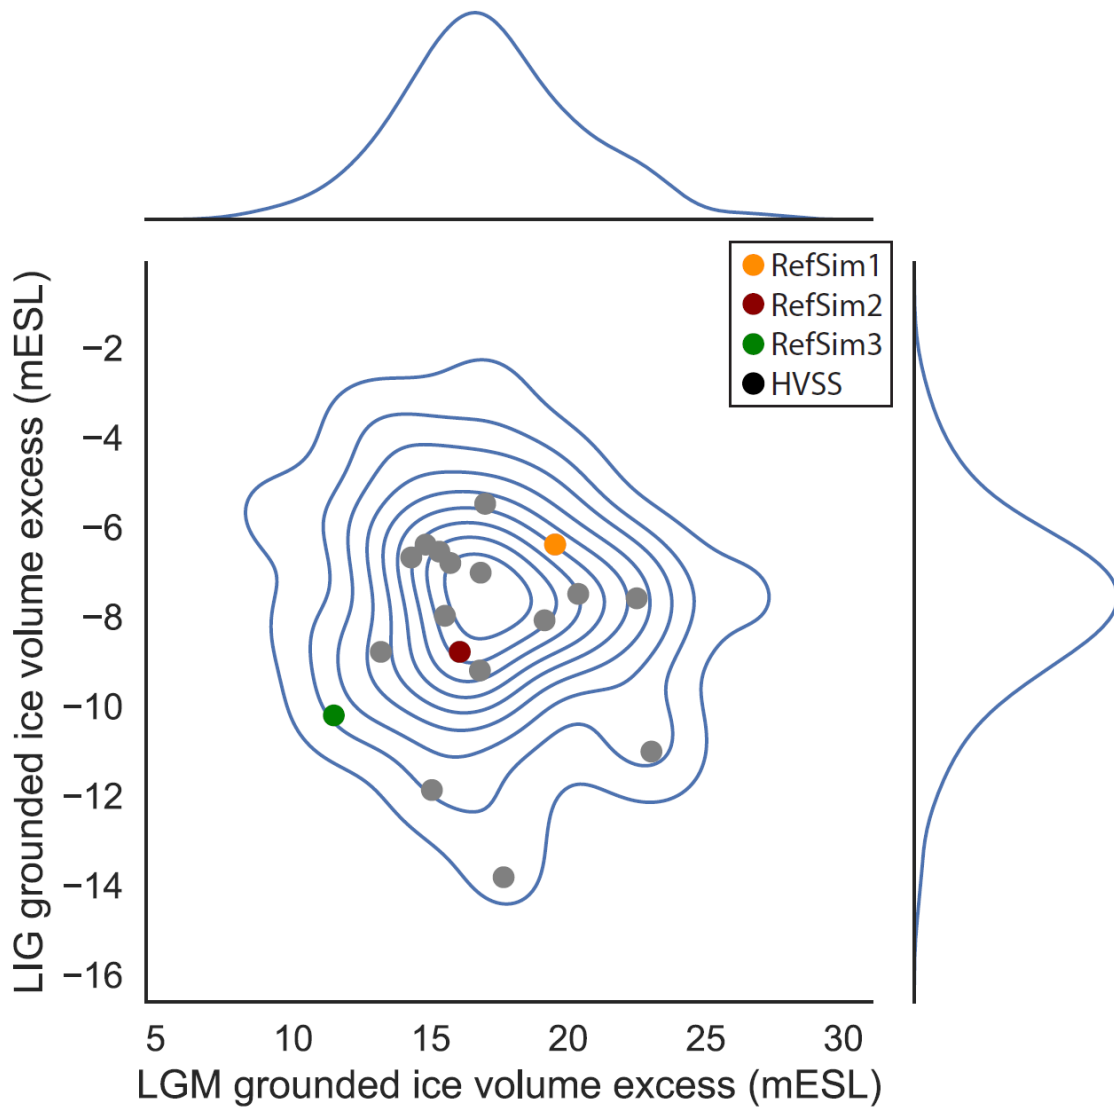

**Figure S9:** High variance subset (HVSS; N=18) of simulations in the not-ruled-out-yet (NROY) AN3sig sub-ensemble.

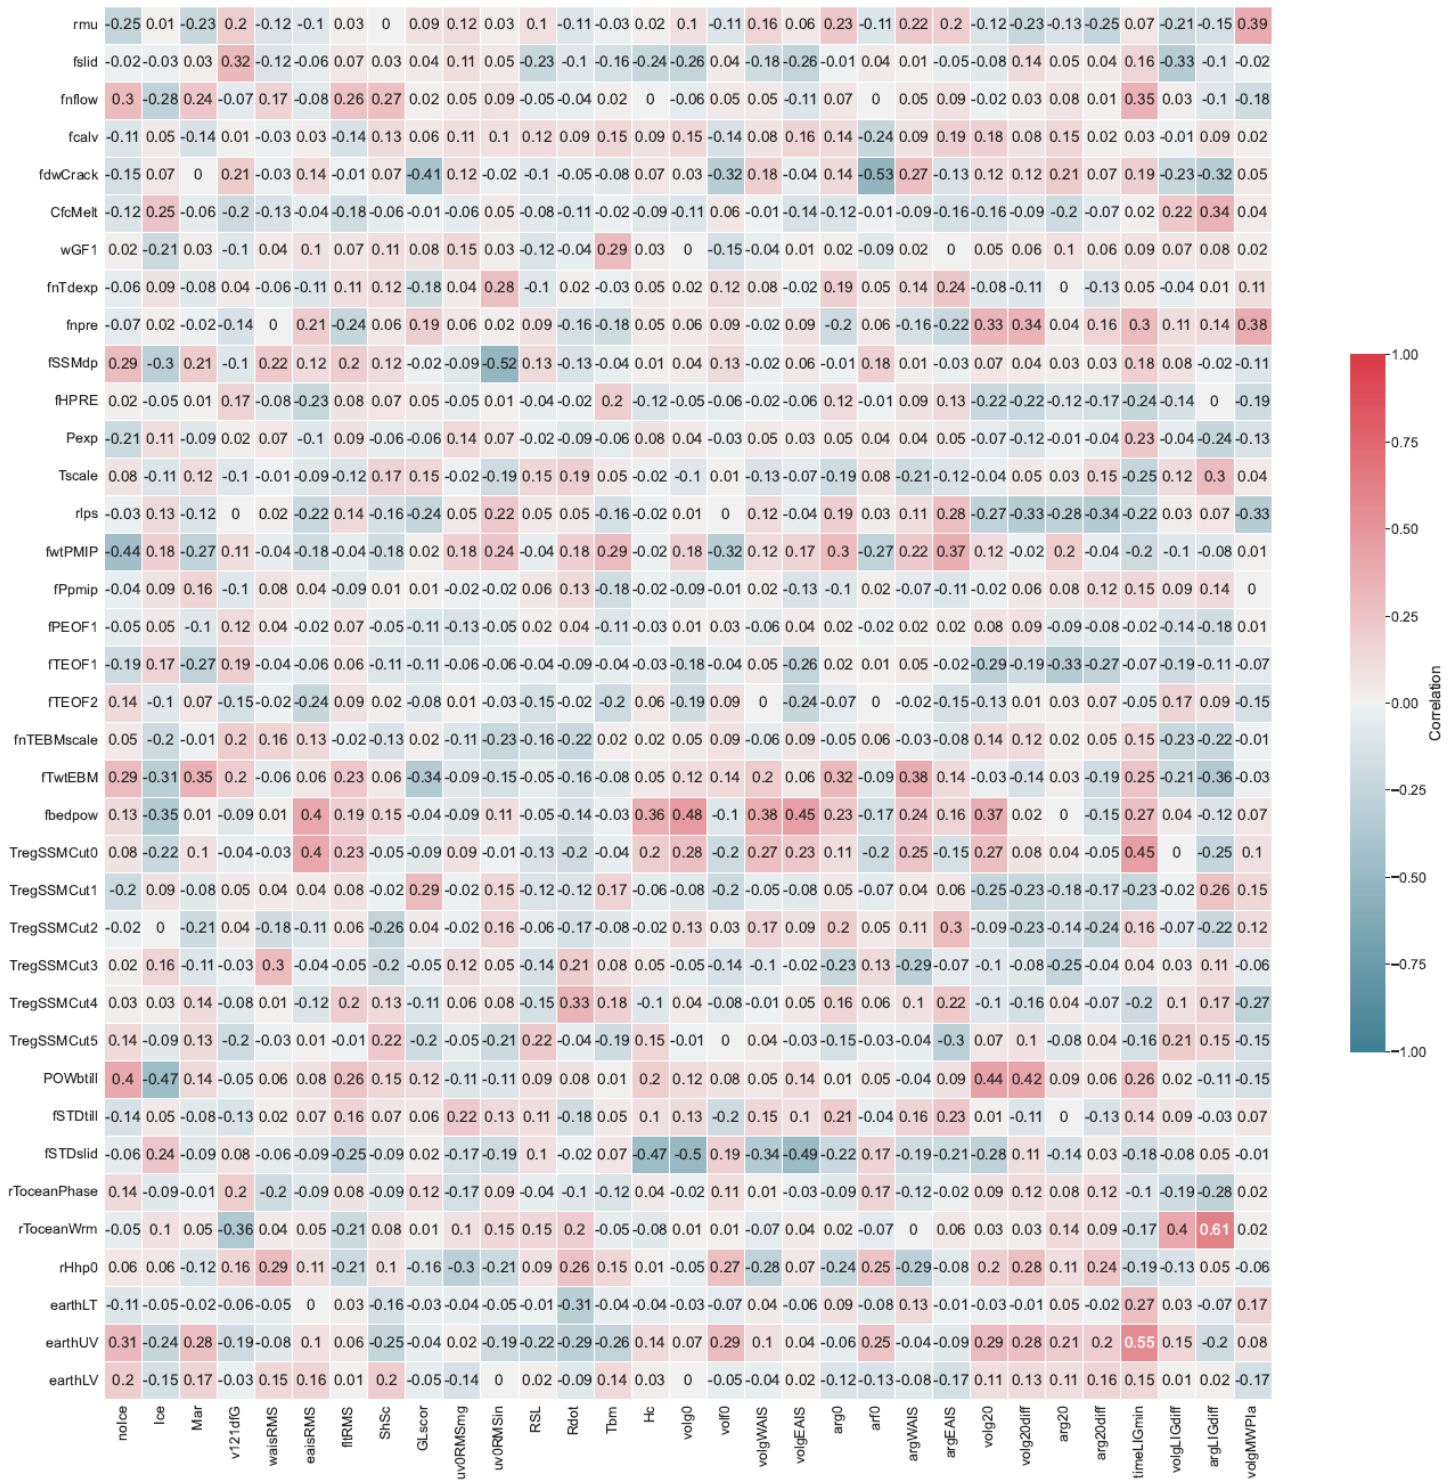

Figure S10: Metric/score-parameter correlation heat map of not-ruled-out-yet (NROY) AN3sig sub-ensemble.

# NROY subensemble statistics

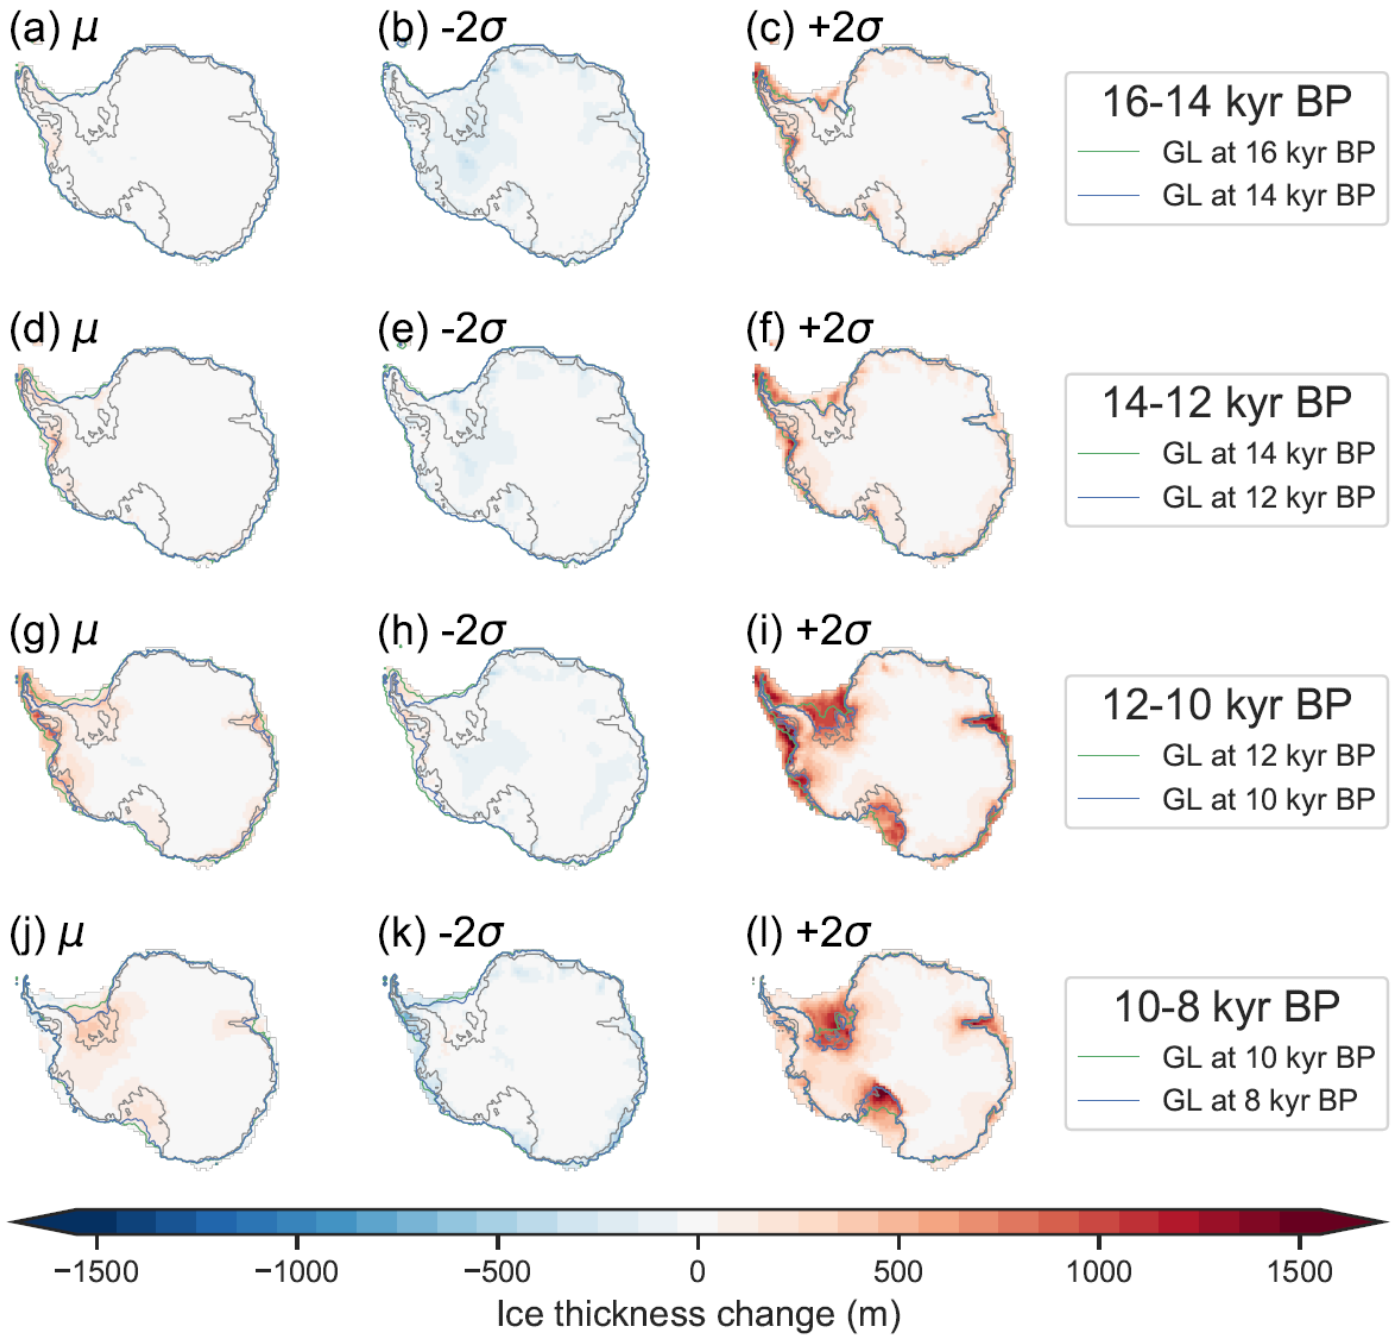

**Figure S11:** NROY AN3sig sub-ensemble deglacial ice thickness difference for the interval of a-c) 16-14 ka d-f) 14-12 ka g-i) 12-10 ka j-l) 10-8 ka and their respective grounding lines for the ensemble mean (leftmost column),  $-2\sigma$  bound (center column), and  $+2\sigma$  bound (rightmost column).

## NROY subensemble statistics

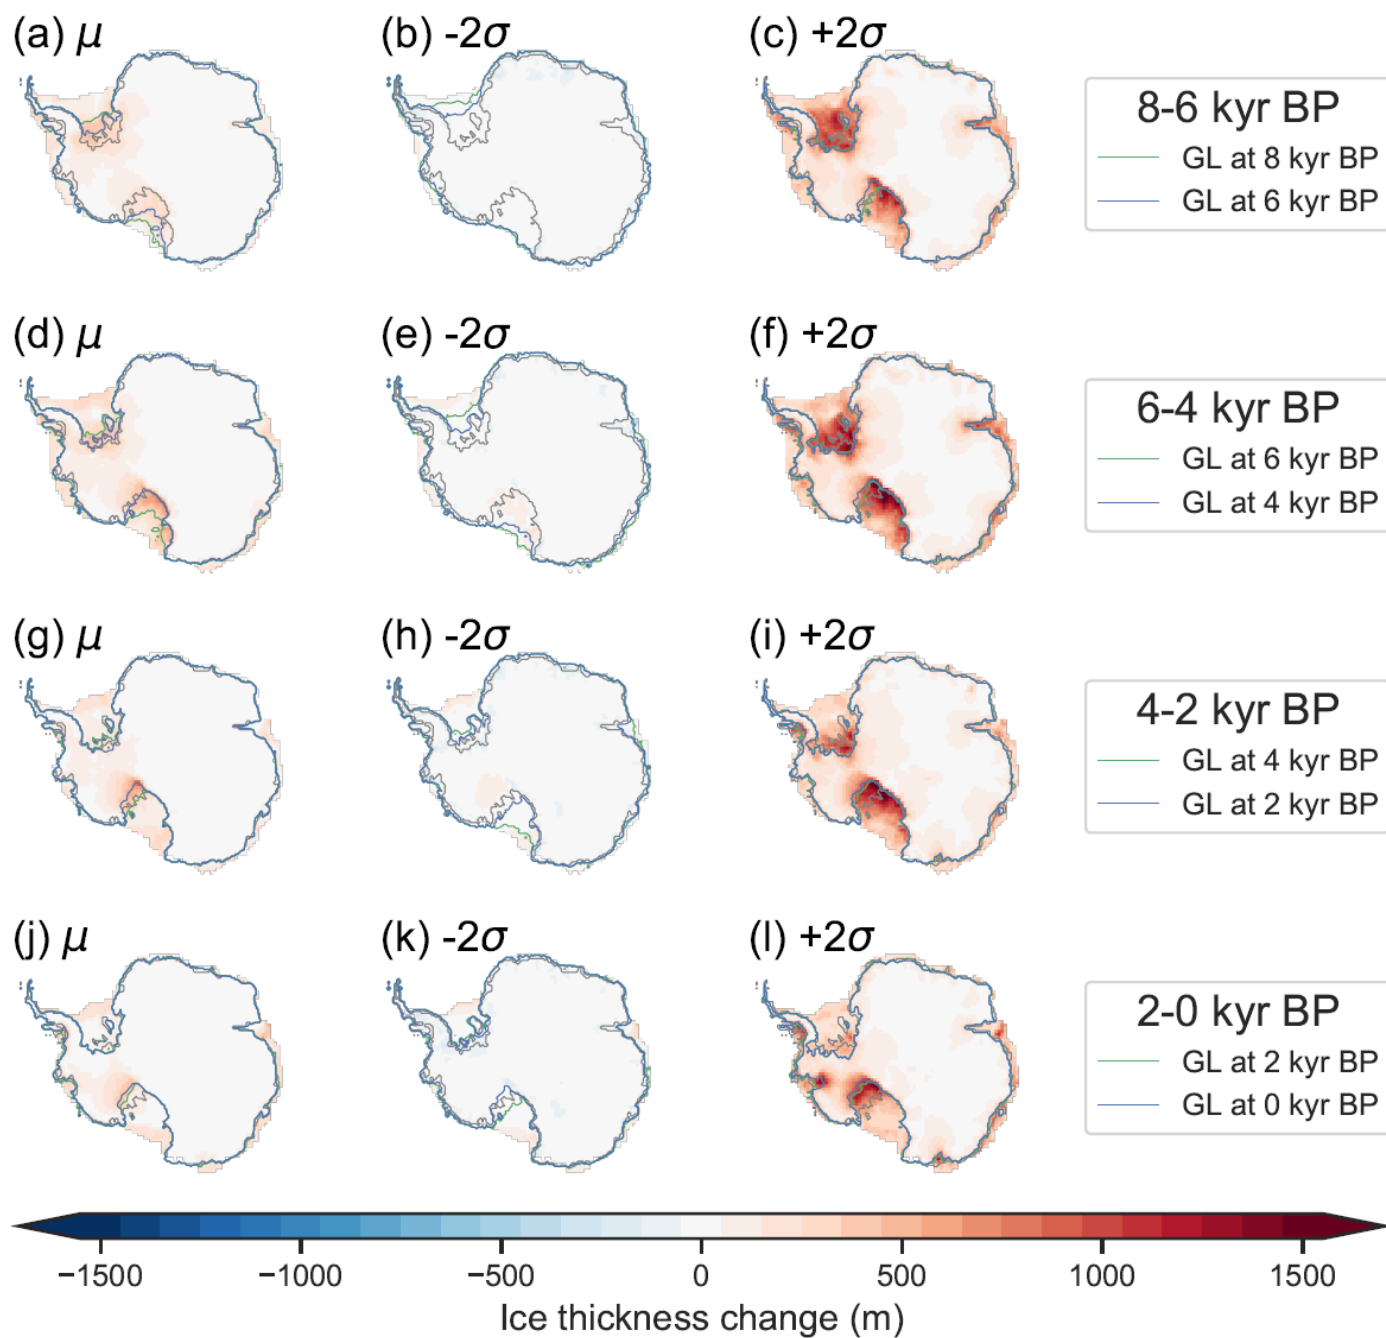

**Figure S12:** NROY AN3sig sub-ensemble deglacial ice thickness difference for the interval of a-c) 8-6 ka d-f) 6-4 ka g-i) 4-2 ka j-l) 2-0 ka and their respective grounding lines for the ensemble mean (leftmost column),  $-2\sigma$  bound (center column), and  $+2\sigma$  bound (rightmost column).
